# Supplementary material
Source: publisher figshare collection journal article supplement (https://karger.figshare.com/ndownloader/files/7526446)
Supplement: Supplementary file 1 [file 7526446]

Supplementary table1. 54 cardiomyopathy-related genes list

| ABCC9 | CSRP3 | EYA4 | LDB3 | NEBL | RBM20 | TNNI3 |
| --- | --- | --- | --- | --- | --- | --- |
| ACTC1 | DES | FHL2 | LMNA | NEXN | SAGD | TNNI3K |
| ACTN2 | DMD | FHOD3 | LMNA4 | PDLIM3 | SCN5A | TNNT2 |
| ACTN2 | DOLK | FKTN | MURC | PKP2 | SDHA | TPM1 |
| ANKRD1 | DSG2 | GATAD1 | MYBPC3 | PLN | TAZ | TTN |
| BAG3 | DSP | ILK | MYH6 | PSEN1 | TCAP | VCL |
| CHRM2 | DSC2 | JUP | MYH7 | PSEN2 | TMPO |  |
| CRYAB | EMD | LDB3 | MYPN | RAF1 | TNNC1 |  |
